# Supplementary material
Source: PubMed Central journal article supplement (PMC3600946)

# Stereochemical Analysis of an Anti-TB Active Diterpene from *Leucophyllum frutescens*

Gloria M. Molina-Salinas,<sup>†,‡,⊥</sup> Verónica M. Rivas-Galindo,<sup>†,⊥</sup> Salvador Said-Fernández,<sup>‡</sup> Δ David C. Lankin,<sup>§</sup> Marcelo A. Muñoz,<sup>||</sup> Pedro Joseph-Nathan,<sup>∇</sup> Guido F. Pauli,<sup>§,\*</sup> Noemí Waksman de Torres<sup>†,\*</sup>

<sup>†</sup> Faculty of Medicine, UANL.

<sup>‡</sup> Instituto Mexicano del Seguro Social, Monterrey.

<sup>§</sup> UIC, Chicago.

<sup>||</sup> Universidad Austral de Chile.

<sup>∇</sup> Centro de Investigación y de Estudios Avanzados del Instituto Politécnico Nacional.

<sup>Δ</sup> Actual adress: Biochemistry Department, Facultad de Medicina, UANL

<sup>⊥</sup> Equally contributing authors.

## Supporting Information

### Table of Contents

|                                                                              | Page |
|------------------------------------------------------------------------------|------|
| I. <sup>1</sup> H-NMR Spectra of Leubethanol on Bruker Avance DPX 400.       | S2   |
| II. <sup>13</sup> C-NMR Spectra of Leubethanol on Bruker Avance DPX 400.     | S5   |
| III. HMQC Spectra of Leubethanol on Bruker Avance DPX 400.                   | S6   |
| IV. <sup>1</sup> H NMR spectra at 900 MHz on Bruker Avance NMR spectrometer. | S7   |

Leubethanol, 400 MHz, CDCl<sub>3</sub>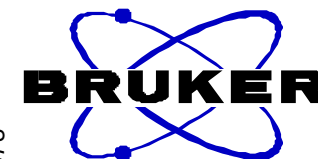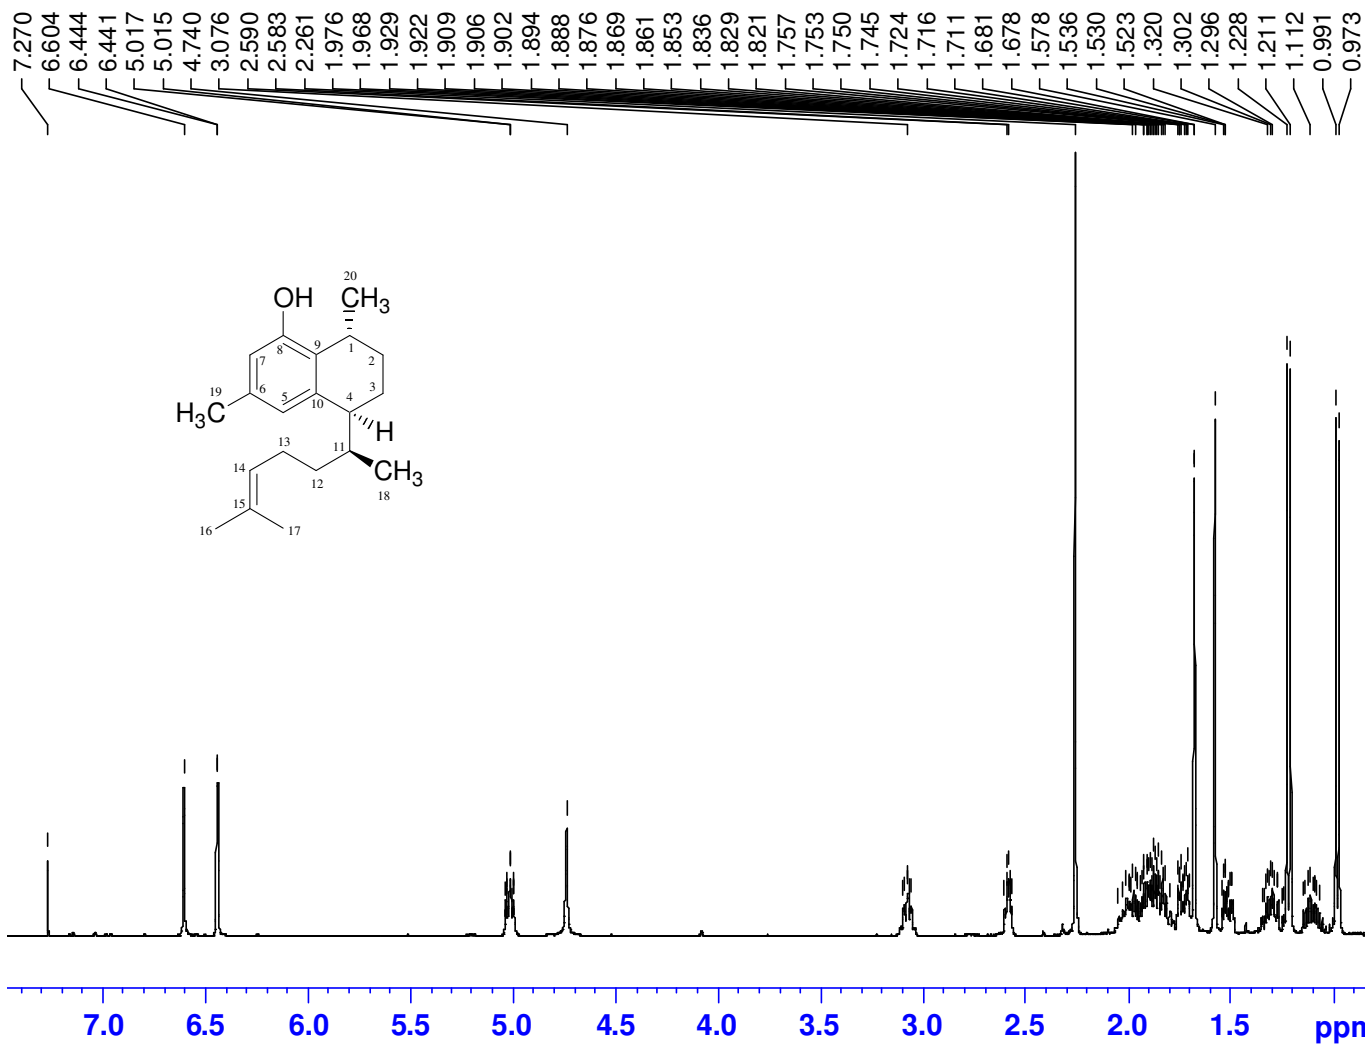

Current Data Parameters  
NAME JPM Min 26 y 27  
EXPNO 1  
PROCNO 1

F2 - Acquisition Parameters  
Date\_ 20090910  
Time 17.20  
INSTRUM spect  
PROBHD 5 mm BBO BB-1H  
PULPROG zg30  
TD 65536  
SOLVENT CDCl<sub>3</sub>  
NS 64  
DS 2  
SWH 3255.208 Hz  
FIDRES 0.049671 Hz  
AQ 10.0663795 sec  
RG 71.8  
DW 153.600 usec  
DE 6.00 usec  
TE 294.2 K  
D1 1.00000000 sec  
TD0 1

===== CHANNEL f1 =====  
NUC1 1H  
P1 12.50 usec  
PL1 -4.20 dB  
SFO1 400.1314622 MHz

F2 - Processing parameters  
SI 32768  
SF 400.1300055 MHz  
WDW no  
SSB 0  
LB 0.00 Hz  
GB 0  
PC 1.00

Leubethanol, 400 MHz, CDCl<sub>3</sub>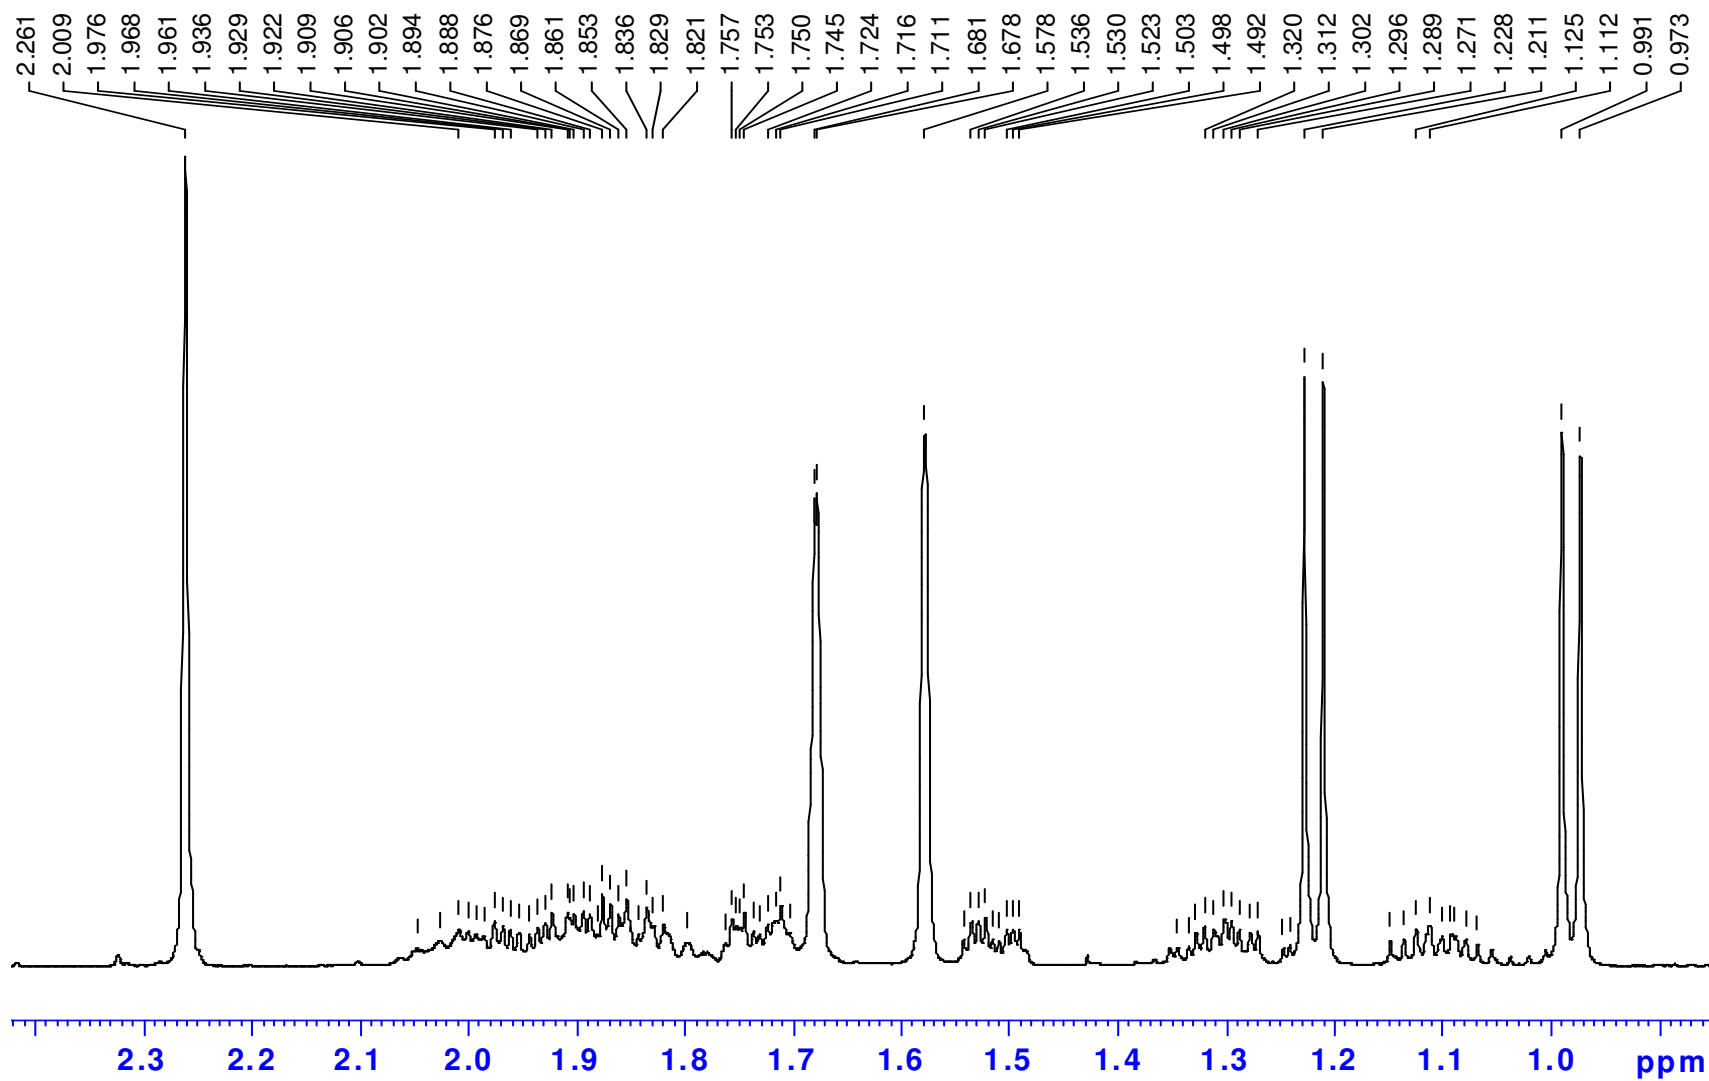

Leubethanol, 400 MHz, CDCl<sub>3</sub>

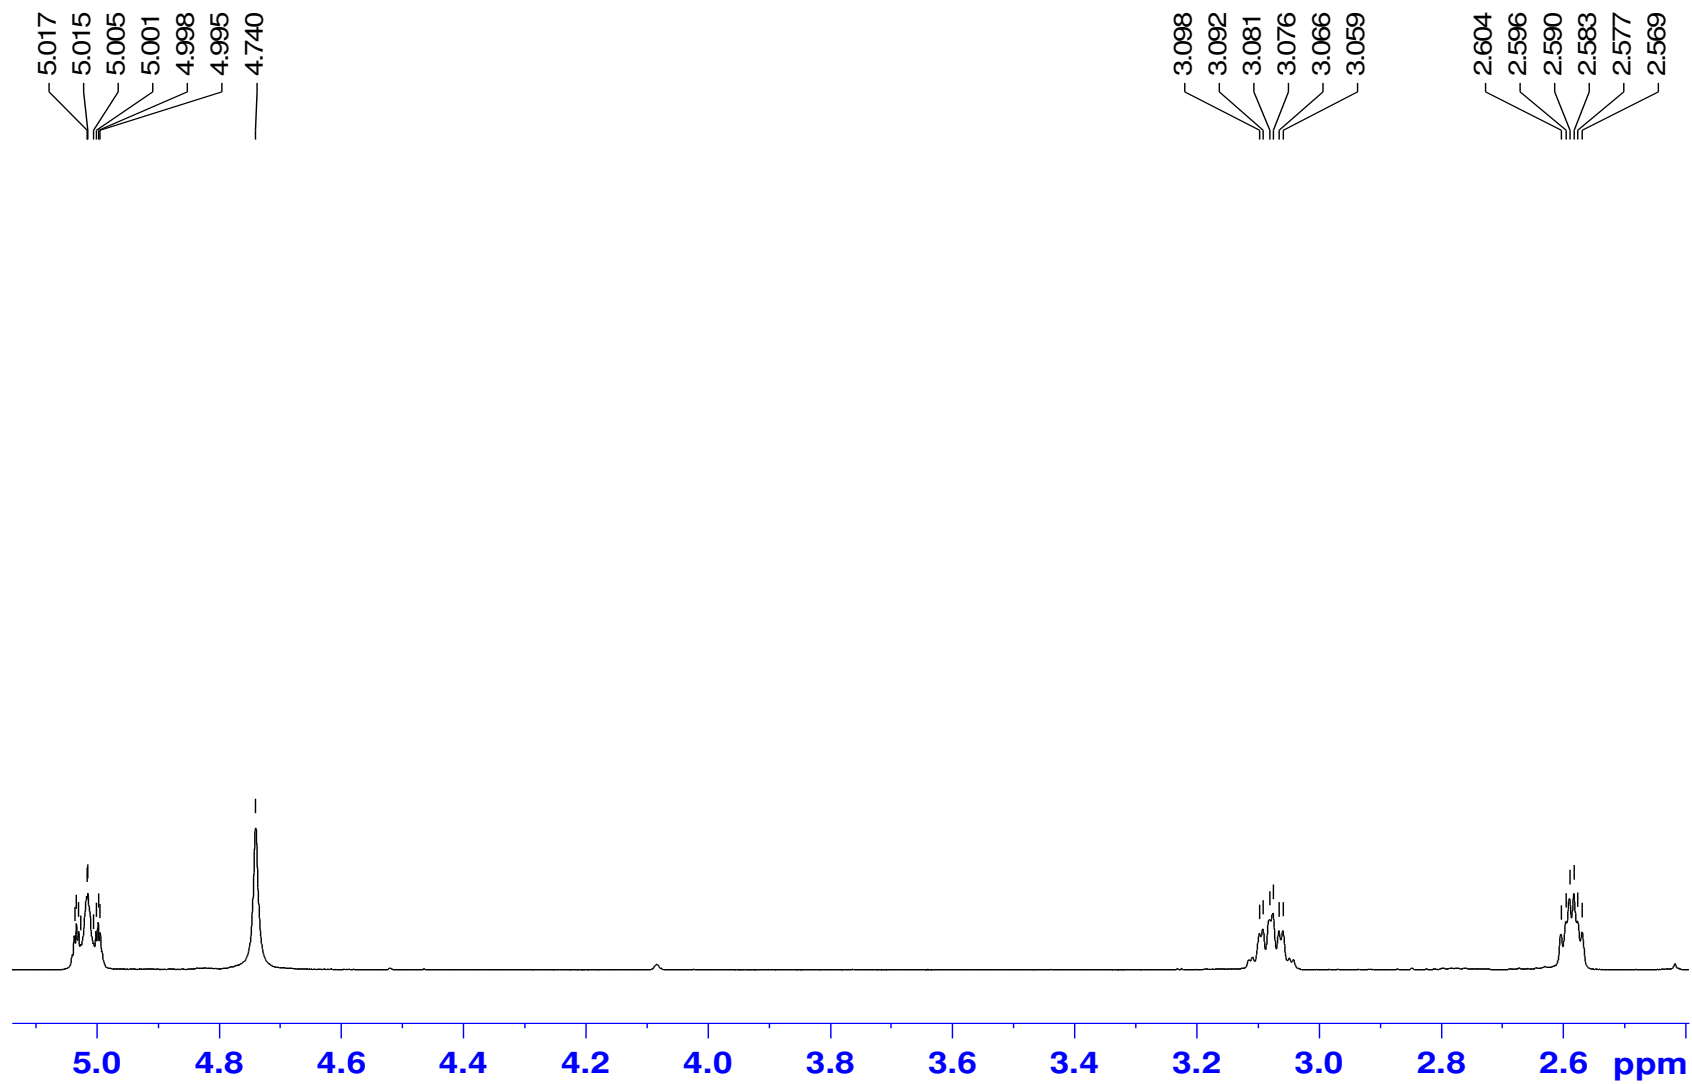

Lfp23, CDC13, <sup>13</sup>CNMR  
Leubethanol

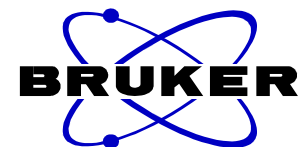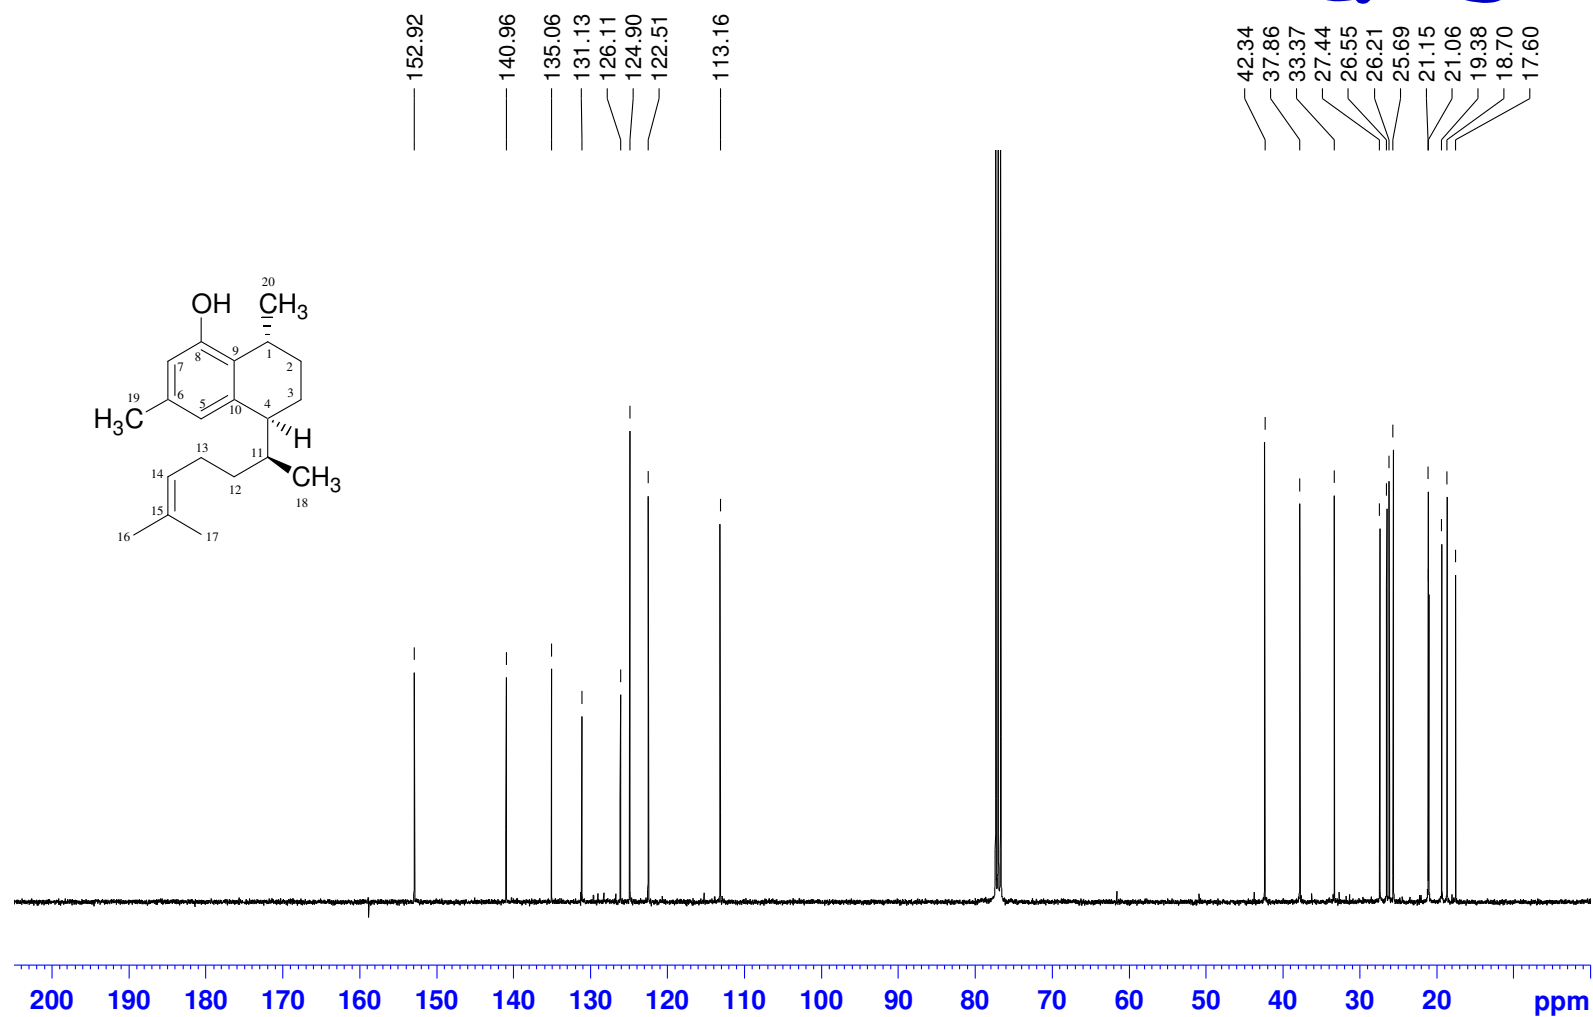

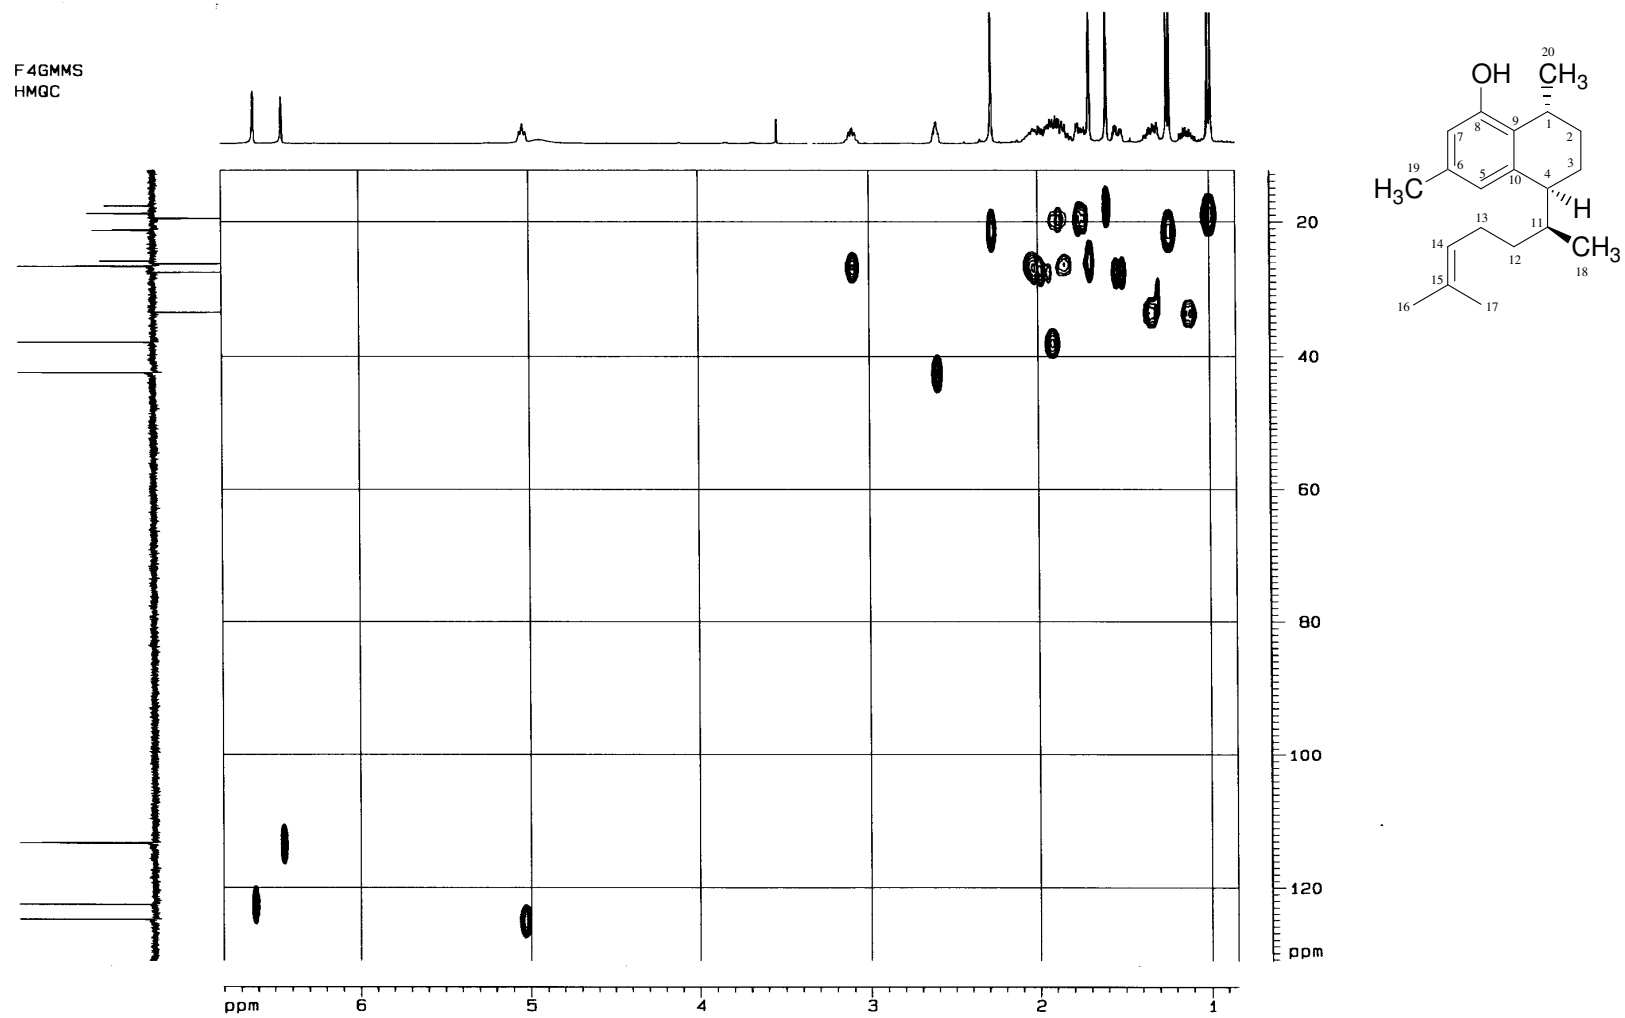

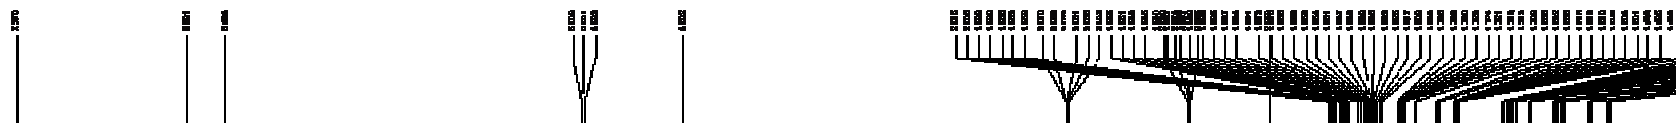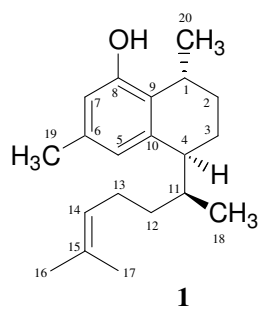

<sup>1</sup>H NMR spectra at 900 MHz on Bruker Avance NMR spectrometer (Bruker, Zurich, Switzerland). Solvent: CDCl<sub>3</sub>.

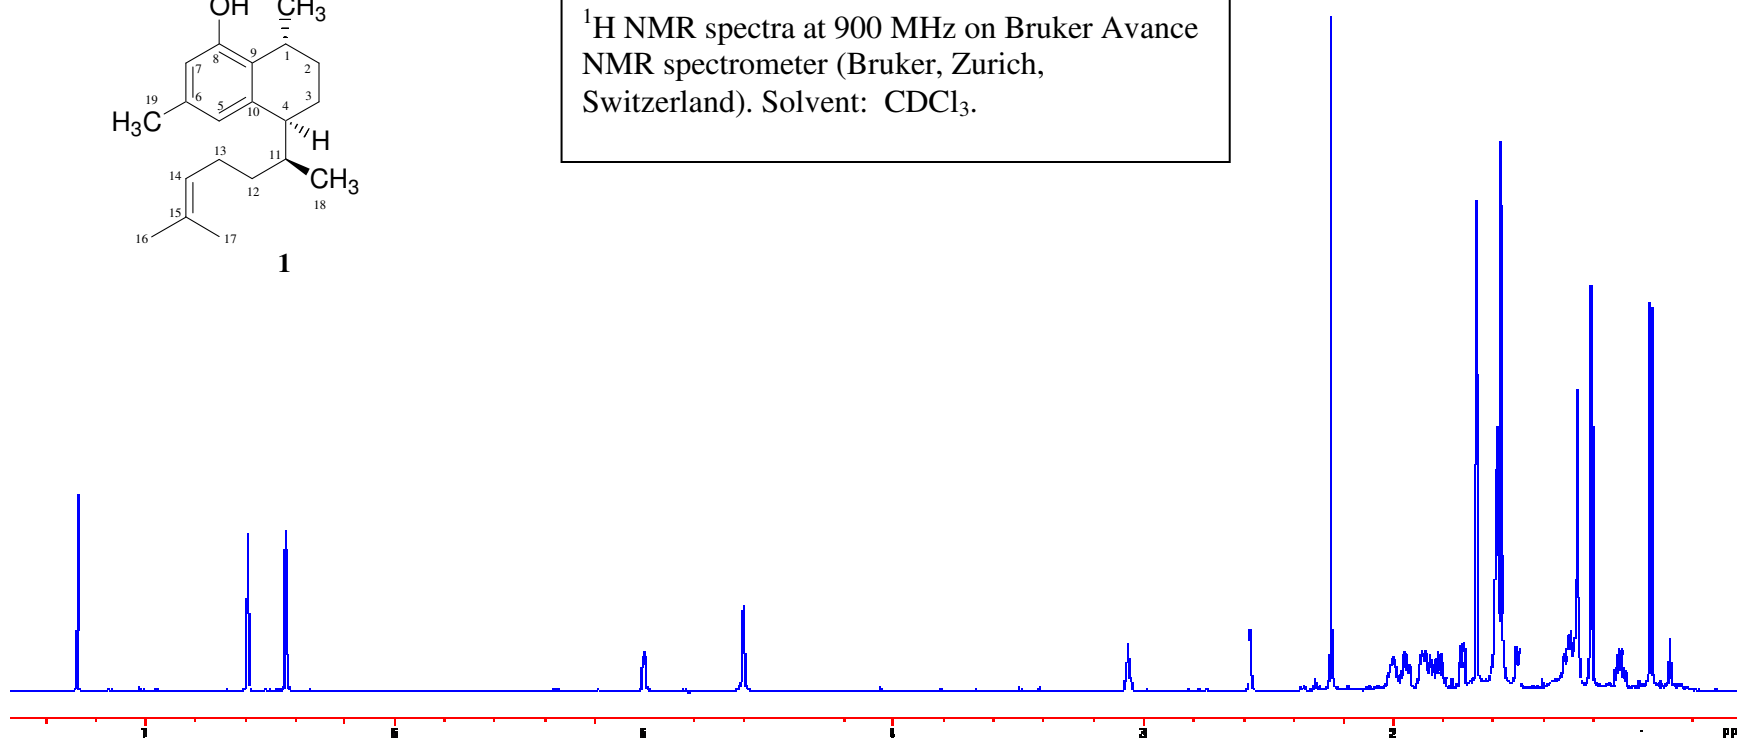

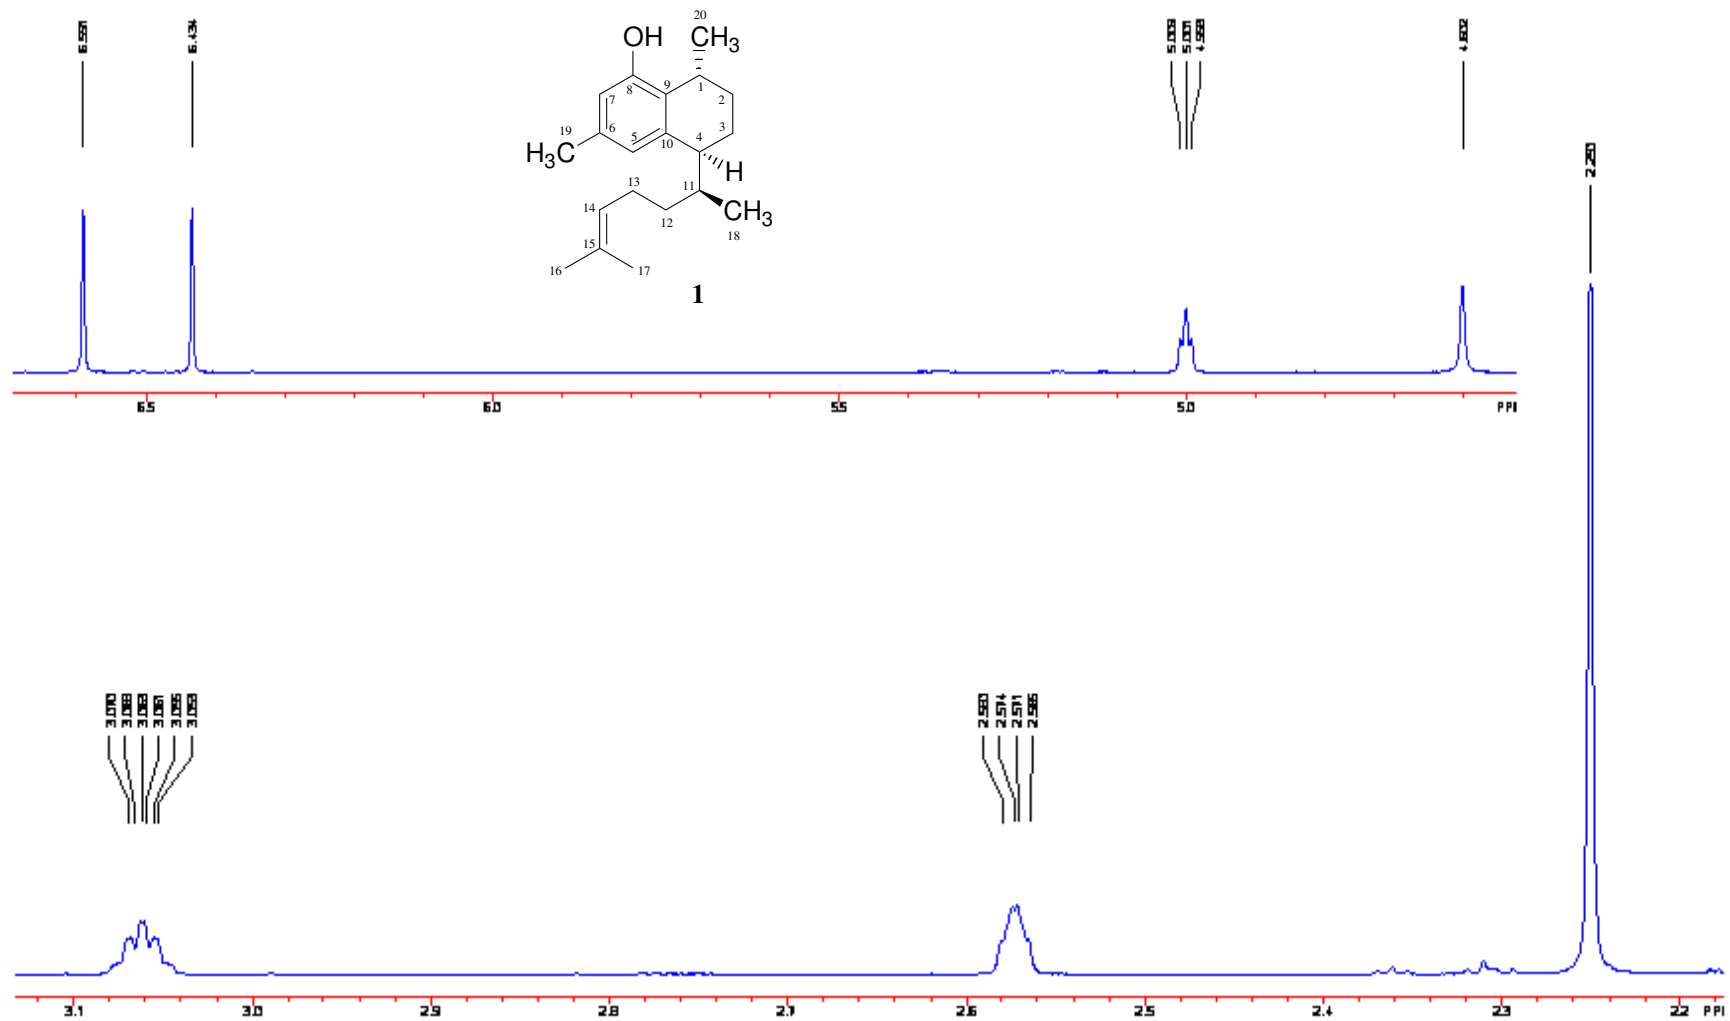

Supplement: NIHMS439346-supplement-Published_Supporting_Information.pdf [file NIHMS439346-supplement-Published_Supporting_Information.pdf]
